# Supplementary material for: Curcumin-Loaded Human Serum Albumin Nanoparticles Prevent Parkinson’s Disease-like Symptoms in C. elegans
Source: MDPI journal article supplement (doi:10.3390/nano12050758), 2022-02-24

**Curcumin-loaded Human Serum Albumin Nanoparticles Pre-vent Parkinson's  
Disease-like Symptoms in *C. elegans***

Arvie Camille V. de Guzman<sup>1</sup>, Md. Abdur Razzak<sup>1,2</sup>, JiYi Kim<sup>1</sup>, and Shin Sik Choi<sup>1,3\*</sup>

<sup>1</sup>Natural Science Research Institute, and Department of Food and Nutrition, Myongji University, Yongin, Republic of Korea; acvdeguzman.2@gmail.com (AC.V.DG); razzak.abdur@kangwon.ac.kr (MA. R); mide-um97@gmail.com (JY. K)

<sup>2</sup>Kangwon Institute of Inclusive Technology (KIIT), and Department of Food Science and Biotechnology, College of Agriculture and Life Sciences, Kangwon National University, Chuncheon-si, Gangwon-do, Republic of Korea.

<sup>3</sup>Department of Energy Science and Technology, Myongji University, Yongin, Republic of Korea.

\* Correspondence: sschoi@mju.ac.kr

## **1. Experimental Section**

### **1.1. CU and HSA interaction analyzed through FTIR**

The possible interactions between CU and HSA were assessed by employing FTIR (Fourier transform infrared) spectroscopy via the ATR method by employing an Agilent Cary 360 spectrometer at 25 °C. Freeze-dried CUHNP samples were placed between the diamond crystal and the ATR accessory. A physical mixture of CU and HSA was also subjected to FTIR to see how nanoparticle formation differs from that of physical mixing. The spectra ranged from 400 to 4000  $\text{cm}^{-1}$ .

### **1.2. Assessment of the worms' intake of CU loaded HSA nanoparticles**

A simple way to measure successful feeding is to count the feeding rate of *C. elegans*. The feeding rate is directly proportional to pharyngeal pumping, which can be directly quantified by counting pumps per minute using a microscope, Axio Imager A2 (Carl Zeiss, Jena, Germany).

## 2. Results

**Supplementary File Figure S1—Fourier transform infrared spectroscopy (FTIR) spectra of CU, HSA, and CU-HSA physical mixtures and CU-HSA nanoparticles (CUHNP).**

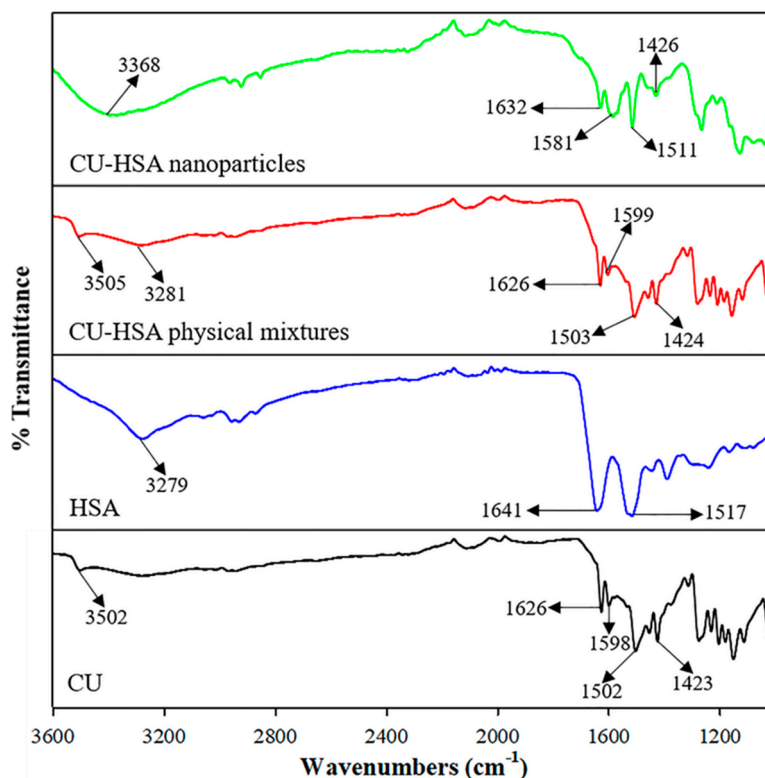

FTIR was employed to identify the forces responsible for the formation of CUHNP nanoparticles. The spectra of CU alone showed characteristic bands at 3502, corresponding to the phenolic O-H stretching vibration. In addition, aromatic C=C band stretching was also visible at 1626  $\text{cm}^{-1}$  and 1595  $\text{cm}^{-1}$ .

For the HSA, a peak appeared at 3279  $\text{cm}^{-1}$  that also corresponds to O-H. The formulated CUHNP demonstrated an O-H bond at 3420  $\text{cm}^{-1}$  that is slightly stronger than curcumin alone.

**Supplementary File Figure S2—Pharyngeal pumping of the *C. elegans*.** Wild type N2 worms exhibited no significant changes in their pharyngeal pumping, even after being fed the nanocomplex. (\*\*\*)  $p < 0.001$ ) N=15 worms.

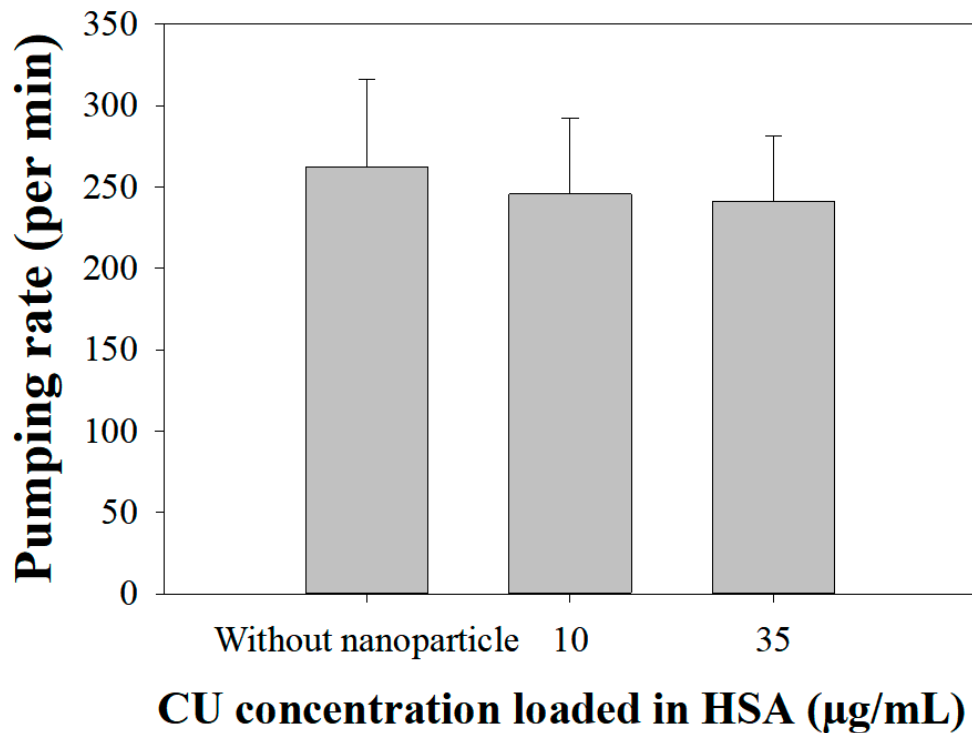

*C. elegans* are able to intake food particles that are about 0.5µm in diameter due to their pharyngeal structures [64]; hence, larger curcumin aggregates might not be able to enter their pharynx. Upon feeding the worms with ~200 nm size of CUHNP, there were no changes in the pharyngeal pumping rate from the control group, which means that *C. elegans* were able to intake the CU-loaded HSA nanoparticles that had been added to their diet.

**Supplementary File Figure S3—CUHNP consumption resulted in enhanced ethanol avoidance.** Wild-type N2 worms exhibited no significant changes in ethanol avoidance, even after being fed the nanocomplex (A). The *cat-2* (*el112*) mutant worms, on the other hand, exhibited rescued alcohol avoidance after treatment with CUHNP. (\*\*\*)  $p < 0.001$

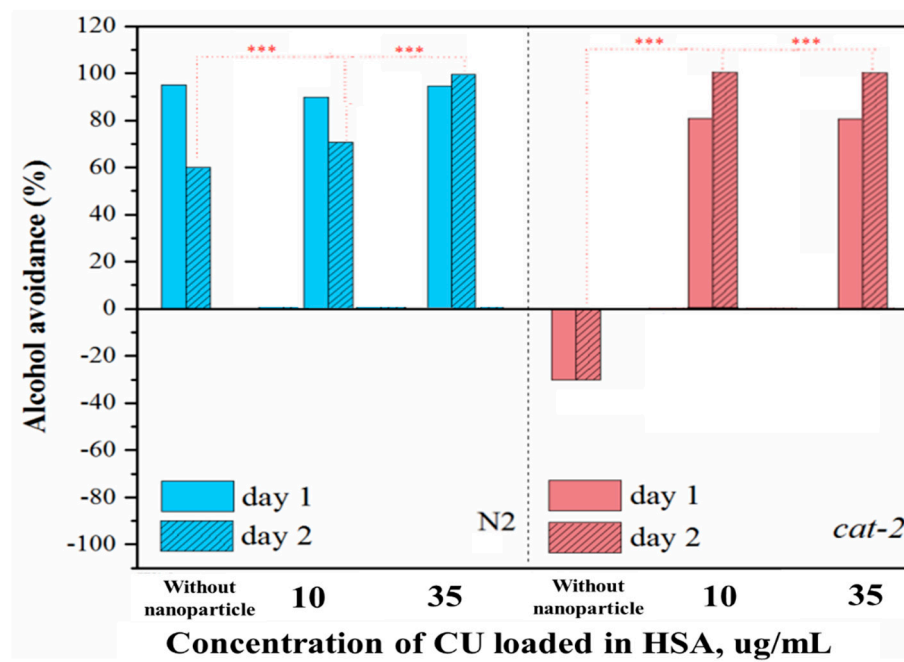

Supplement: s1 [file s1]
